# Supplementary material for: Solid-State Self-Assembly of a Linear Hexanuclear Copper(II) Oxamate Complex with Alternating Antiferro- and Ferromagnetic Coupling
Source: MDPI journal article supplement (doi:10.3390/magnetochemistry8100116), 2022-09-28
Supplement: s1 [file s1]

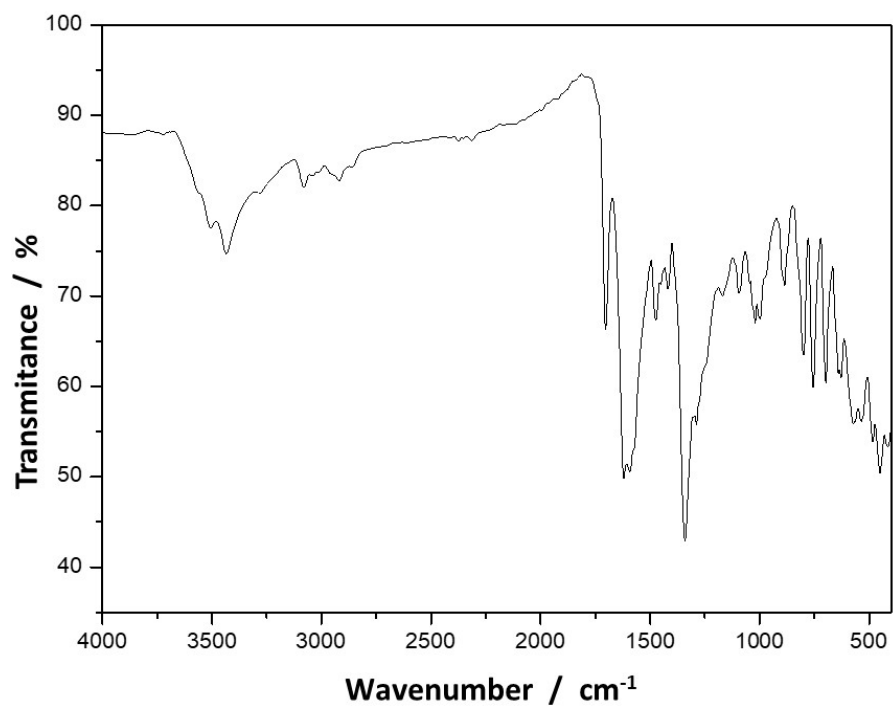

**Figure S1.** FTIR spectrum of **1**.

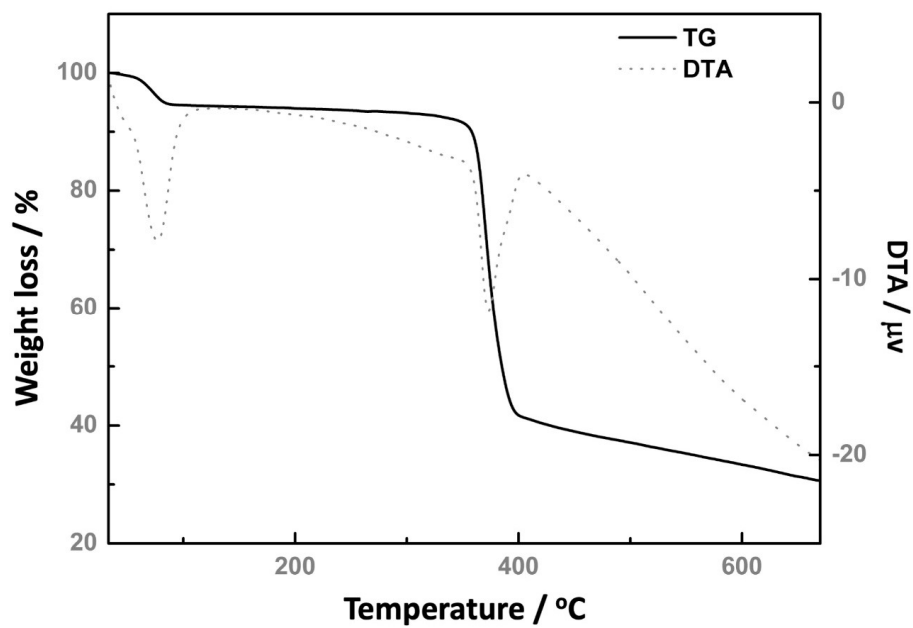

**Figure S2.** TG (solid line) and DTG (dashed line) curves for **1** in N<sub>2(g)</sub> atmosphere.

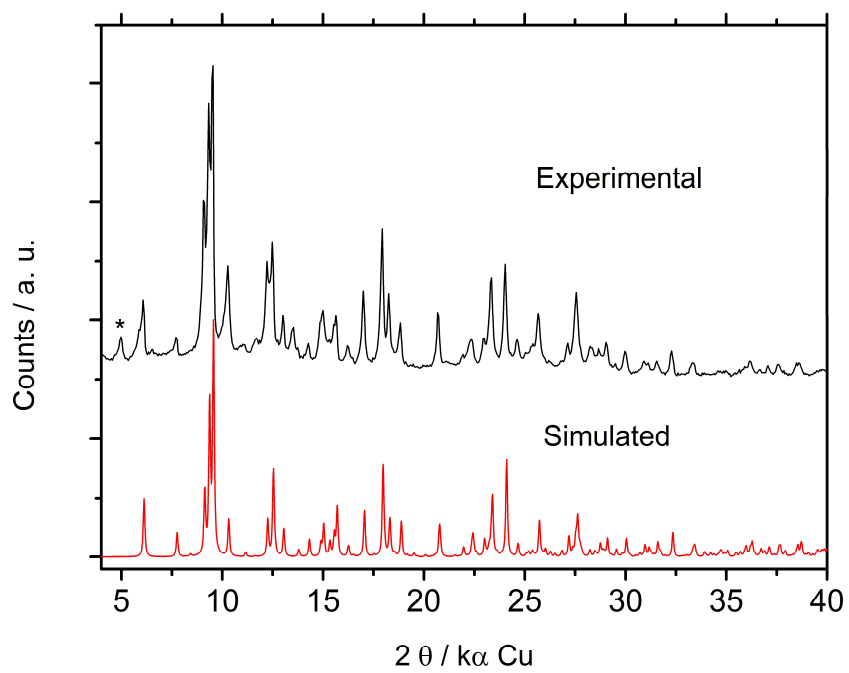

**Figure S3.** Experimental (solid black line) and simulated (solid red line) PXRd patterns for **1**.

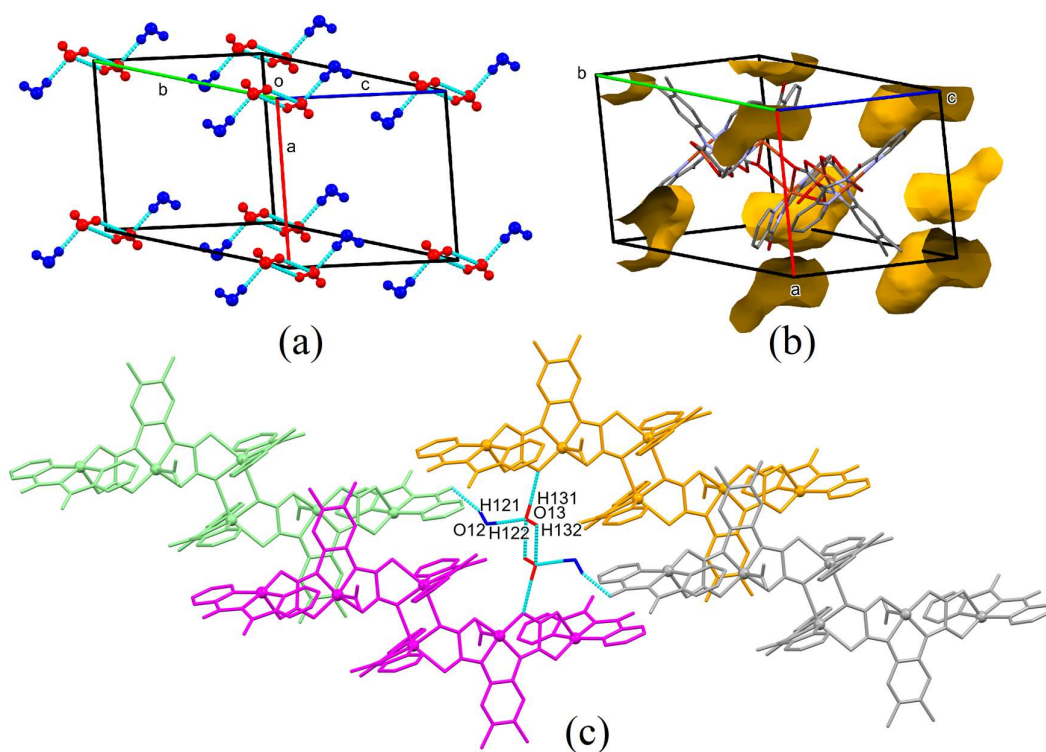

**Figure S4.** (a) View the crystallization water super-structure depicting the tetramer-cluster at the unit cell corner and (b) the calculated voids (surfaces in orange) surrounding a hexanuclear unit inside the unit cell in the same perspective view. View of each water-cluster surrounded by four hexanuclear units (c) being stabilized by the H bond network. The scheme color (red and blue) in (a) differentiates the independent symmetry of water molecules in the asymmetric unit. H bond is in dashed cyan lines. Non-water hydrogen atoms were omitted in some views for clarity.

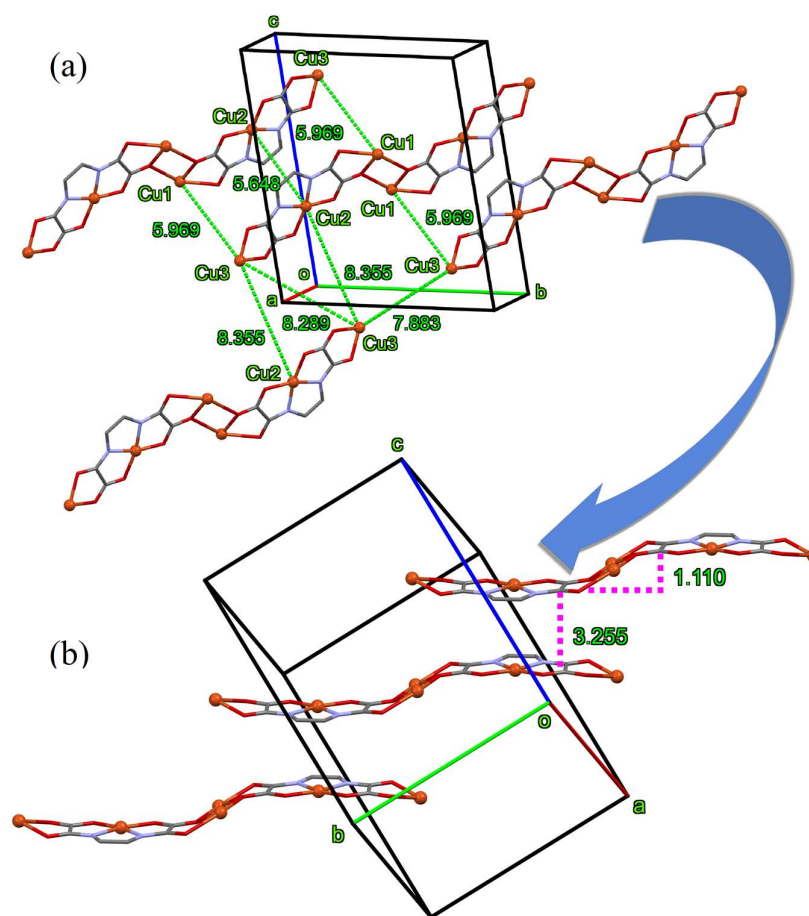

**Figure S5** (a) Packing view of the hexanuclear units showing the chains along the crystallographic *b* axis showing the shortest interhexanuclear Cu...Cu distances (dashed green lines). (b) The perspective view of the star-like chain showing the parallel disposition of the hexanuclear units along the crystallographic *c* axis is shifted along the crystallographic *b* axis resulting in a stair-like chain formed along the crystallographic *b* axis with two-step rises (highlighted in magenta dashed lines). Just the copper atoms and part of the dmopba ligand were used to generate the illustration for clarity.

**Table S1.** Crystal data and structure refinement for **1**.

|                                   |                                                                                 |                         |
|-----------------------------------|---------------------------------------------------------------------------------|-------------------------|
| CCDC                              | 2201495                                                                         |                         |
| Empirical formula                 | C <sub>36</sub> H <sub>30</sub> Cu <sub>3</sub> N <sub>8</sub> O <sub>13</sub>  |                         |
| Molecular formula                 | C <sub>72</sub> H <sub>60</sub> Cu <sub>6</sub> N <sub>16</sub> O <sub>26</sub> |                         |
| Empirical formula weight          | 973.30                                                                          |                         |
| Measurement temperature           | 293(2) K                                                                        |                         |
| Wavelength                        | 0.71073 Å                                                                       |                         |
| Crystal system                    | Triclinic                                                                       |                         |
| Space group                       | P $\bar{1}$                                                                     |                         |
| Unit cell dimensions              | a = 10.781 Å                                                                    | $\alpha = 98.24^\circ$  |
|                                   | b = 12.956 Å                                                                    | $\beta = 105.08^\circ$  |
|                                   | c = 15.572 Å                                                                    | $\gamma = 113.74^\circ$ |
| Volume                            | 1845.3 Å <sup>3</sup>                                                           |                         |
| Z/Z'                              | 1/0.5                                                                           |                         |
| Density (calculated)              | 1.752 Mg/m <sup>3</sup>                                                         |                         |
| Absorption coefficient            | 1.794 mm <sup>-1</sup>                                                          |                         |
| F(000)                            | 986                                                                             |                         |
| Theta range for data collection   | 1.789 to 29.483°.                                                               |                         |
| Index ranges                      | -11 ≤ h ≤ 13, -17 ≤ k ≤ 17, -19 ≤ l ≤ 18                                        |                         |
| Reflections collected             | 18486                                                                           |                         |
| Independent reflections           | 8727 [R(int) = 0.0349]                                                          |                         |
| Completeness to theta = 25.242°   | 100.0 %                                                                         |                         |
| Data / restraints / parameters    | 8727 / 9 / 552                                                                  |                         |
| Goodness-of-fit on F <sup>2</sup> | 1.032                                                                           |                         |
| Final R indices [I > 2σ(I)]       | R1 = 0.0388, wR2 = 0.0855                                                       |                         |
| R indices (all data)              | R1 = 0.0587, wR2 = 0.0954                                                       |                         |
| Largest diff. peak and hole       | 0.425 and -0.551 e.Å <sup>-3</sup>                                              |                         |

**Table S2.** Bond lengths [Å] and angles [°] for **1**.

| Cu1 Geometry |           | Cu2 Geometry |           | Cu3 Geometry |           |
|--------------|-----------|--------------|-----------|--------------|-----------|
| N3–Cu1       | 2.022(2)  | O3–Cu2       | 1.977(2)  | N6–Cu3       | 2.000(2)  |
| N4–Cu1       | 1.924(2)  | O4–Cu2       | 1.969(2)  | N7–Cu3       | 1.921(2)  |
| N5–Cu1       | 1.997(2)  | N1–Cu2       | 1.916(2)  | N8–Cu3       | 2.004(2)  |
| O1–Cu1       | 2.404(2)  | N2–Cu2       | 1.918(2)  | O5–Cu3       | 1.955(2)  |
| O2–Cu1       | 1.969(2)  | O11–Cu2      | 2.484(2)  | O6–Cu3       | 2.274(2)  |
| O2i–Cu1      | 2.629(2)  | N1–Cu2–N2    | 83.61(9)  | N7–Cu3–O5    | 170.62(9) |
| N4–Cu1–O2    | 170.27(9) | N1–Cu2–O4    | 167.74(8) | N7–Cu3–N6    | 82.07(9)  |
| N4–Cu1–N5    | 82.37(9)  | N2–Cu2–O4    | 84.68(8)  | O5–Cu3–N6    | 100.12(8) |
| O2–Cu1–N5    | 98.91(8)  | N1–Cu2–O3    | 84.72(8)  | N7–Cu3–N8    | 82.13(9)  |
| N4–Cu1–N3    | 81.97(9)  | N2–Cu2–O3    | 167.93(8) | O5–Cu3–N8    | 95.14(9)  |
| O2–Cu1–N3    | 96.77(8)  | O4–Cu2–O3    | 106.75(7) | N6–Cu3–N8    | 164.06(9) |
| N5–Cu1–N3    | 164.28(9) | N1–Cu2–O11   | 90.46(9)  | N7–Cu3–O6    | 109.38(8) |
| N4–Cu1–O1    | 113.19(8) | N2–Cu2–O11   | 88.75(9)  | O5–Cu3–O6    | 79.69(7)  |
| O2–Cu1–O1    | 76.41(7)  | O3–Cu2–O11   | 94.41(8)  | N6–Cu3–O6    | 93.40(8)  |
| N5–Cu1–O1    | 94.47(8)  | O4–Cu2–O11   | 92.87(8)  | N8–Cu3–O6    | 93.83(9)  |
| N3–Cu1–O1    | 90.37(8)  |              |           |              |           |

Symmetry transformations used to generate equivalent atoms: (i) =  $-x+1, -y+1, -z+1$

**Table S3.** Hydrogen bond lengths [Å] and angles [°] for **1**, where D and A are the donor and acceptor hydrogen atom, respectively.

|                              | D—H  | H...A | D...A    | A—H...A | Symmetry codes*                  |
|------------------------------|------|-------|----------|---------|----------------------------------|
| O12—H121...O9                | 0.87 | 2.12  | 2.944(5) | 158.2   |                                  |
| O13—H131...O4                | 0.87 | 2.21  | 3.008(4) | 152.9   |                                  |
| O11—H112...O10 <sup>ii</sup> | 0.87 | 1.93  | 2.799(3) | 173.7   | <sup>ii</sup> $-x+1, -y+2, -z+2$ |
| C14—H14...O10 <sup>ii</sup>  | 0.93 | 2.47  | 3.349(4) | 157.5   | <sup>ii</sup> $-x+1, -y+2, -z+2$ |
| C34—H34...O6 <sup>ii</sup>   | 0.93 | 2.62  | 3.328(4) | 133.6   | <sup>ii</sup> $-x+1, -y+2, -z+2$ |
| O11—H111...O7 <sup>iii</sup> | 0.87 | 2.08  | 2.929(3) | 163.8   | <sup>iii</sup> $-x, -y+1, -z+1$  |
| C35—H35...O7 <sup>iii</sup>  | 0.93 | 2.51  | 3.316(4) | 145.0   | <sup>iii</sup> $-x, -y+1, -z+1$  |
| C35—H35...O8 <sup>iii</sup>  | 0.93 | 2.52  | 3.285(4) | 139.2   | <sup>iii</sup> $-x, -y+1, -z+1$  |
| C15—H15...O1 <sup>iii</sup>  | 0.93 | 2.55  | 3.314(3) | 139.8   | <sup>iii</sup> $-x, -y+1, -z+1$  |
| O12—H122...O13 <sup>iv</sup> | 0.87 | 2.13  | 2.996(6) | 173.6   | <sup>iv</sup> $-x+2, -y+3, -z+2$ |
| O13—H132...O13 <sup>v</sup>  | 0.87 | 2.60  | 3.200(8) | 127.5   | <sup>v</sup> $-x+2, -y+2, -z+2$  |

\* Symmetry transformations used to generate equivalent atoms

**Table S4.** Shape measurements analysis for **1\***.

| <b>ML<sub>6</sub></b> |             |              |               |              |                |
|-----------------------|-------------|--------------|---------------|--------------|----------------|
|                       | <b>HP-6</b> | <b>PPY-6</b> | <b>OC-6</b>   | <b>TPR-6</b> | <b>JPPY-6</b>  |
| Cu1                   | 33.980      | 21.179       | 4.338         | 11.172       | 24.305         |
| <b>ML<sub>5</sub></b> |             |              |               |              |                |
|                       | <b>PP-5</b> | <b>vOC-5</b> | <b>TBPY-5</b> | <b>SPY-5</b> | <b>JTBPY-5</b> |
| Cu2                   | 31.274      | 1.911        | 6.683         | 1.508        | 9.644          |
| Cu3                   | 25.562      | 2.323        | 6.920         | 2.334        | 9.061          |

\*HP-6 = Hexagon; PPY-6 = Pentagonal pyramid; OC-6 = Octahedron; TPR-6 = Trigonal prism; JPPY-6 = Johnson pentagonal pyramid J2; PP-5 = Pentagon; vOC-5 = Vacant octahedron; TBPY-5 = Trigonal bipyramid; SPY-5 = Spherical square pyramid; JTBPY-5 = Johnson trigonal bipyramid J12.
